# Supplementary material
Source: PubMed Central journal article supplement (PMC3498593)
Supplement: NIHMS419603-supplement-1_si_001.pdf [file NIHMS419603-supplement-1_si_001.pdf]

*Supporting Information:*

**“Fast Photochemical Oxidation of Proteins” (FPOP) and Mass Spectrometry Follow Sub-millisecond Protein Folding at the Amino-Acid Level**

Jiawei Chen, Don L. Rempel, Brian C. Gau, Michael L. Gross

Department of Chemistry, Washington University, One Brookings Drive, Saint Louis, Missouri 63130

Email: mgross@wustl.edu

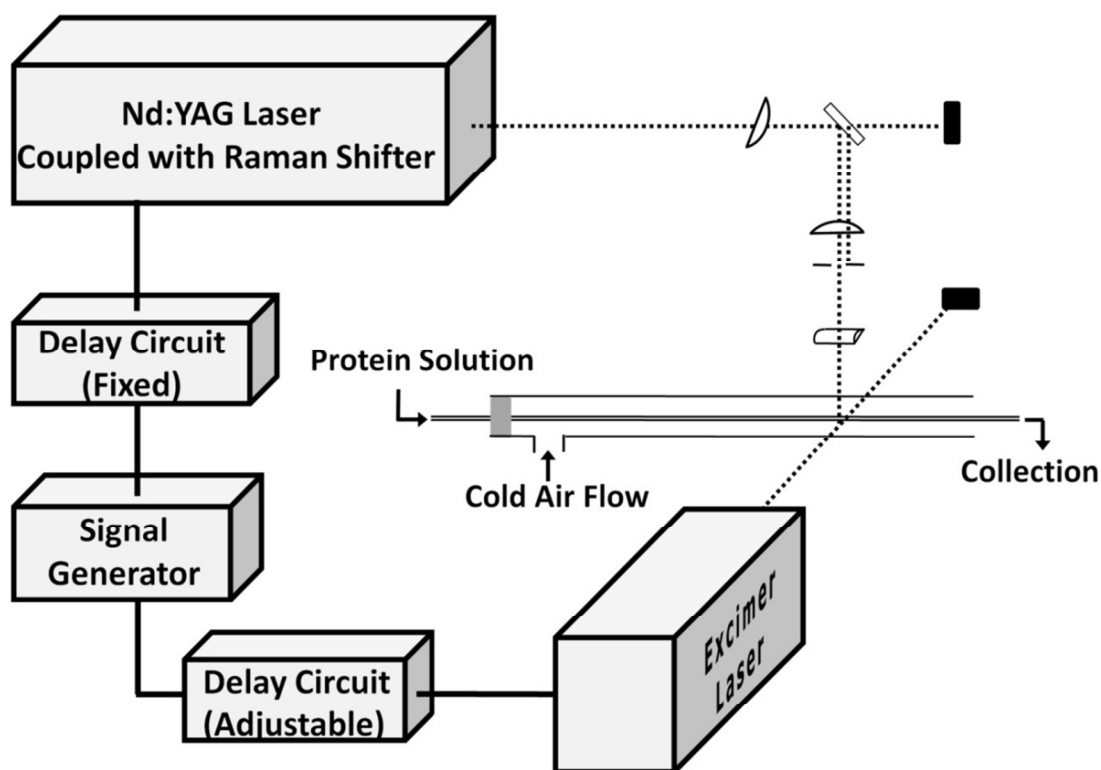

Figure S1: Schematic of the “pump-probe” system (taken from reference 29)

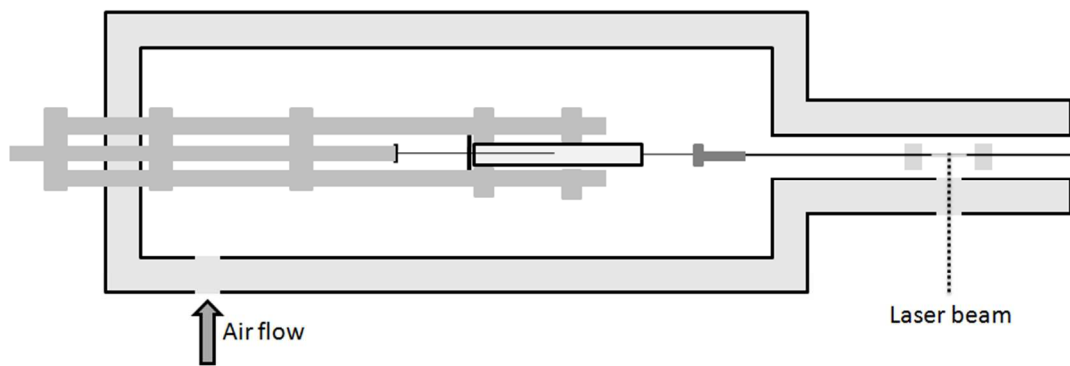

Figure S2: Schematic of the 2<sup>nd</sup> chamber of the temperature-control system (taken from the Ph.D.

Dissertation of Jiawei Chen, Washington University in St. Louis, 2012)
